# Supplementary material for: Alkaline cation directed structural diversity of cubic-cage-based cobalt(ii) metal–organic frameworks: from pcu to bct net
Source: Royal Society of Chemistry journal article supplement (doi:10.1039/c4ce00597j), 2014-05-31
Supplement: c4ce00597j1.pdf [file c4ce00597j1.pdf]

## Electronic Supplementary Information

### Alkaline cations directed structural diversity of cubic-cage-based cobalt(II) metal-organic frameworks: from *pcu* to *bct* net

Ji-Yong Zou,<sup>a,b</sup> Wei Shi,<sup>\*a</sup> Jing-Ya Zhang,<sup>a</sup> Yan-Fei He,<sup>a</sup> Hong-Ling Gao,<sup>b</sup> Jian-Zhong Cui<sup>b</sup> and Peng Cheng<sup>\*a</sup>

<sup>a</sup> Department of Chemistry, Key Laboratory of Advanced Energy Material Chemistry (MOE), and Collaborative Innovation Center of Chemical Science and Engineering (Tianjin), Nankai University, Tianjin 300071, P. R. China

<sup>b</sup> Department of Chemistry, Tianjin University, Tianjin 300072, P. R. China

## 1. Thermogravimetric analysis

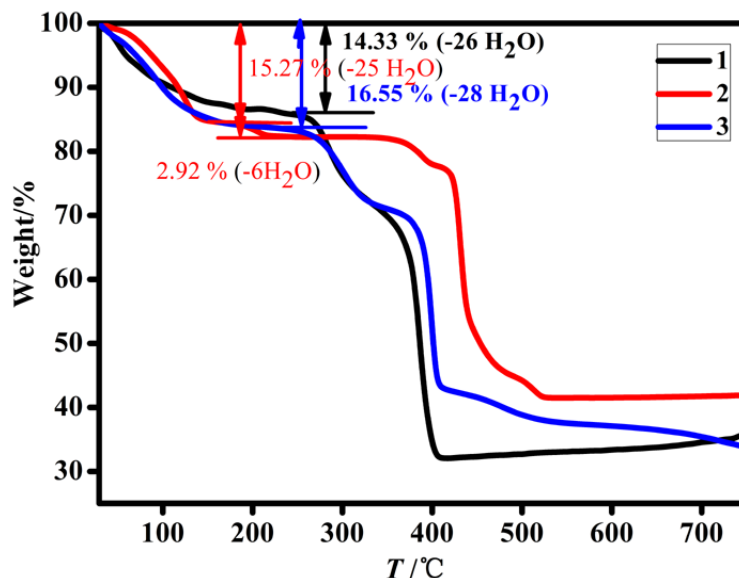

Fig. S1. The thermal gravimetric analysis (TGA) data of 1-3.

The TGA curve shows a weight loss of 14.33% for **1** during the first major step before 250 °C, corresponding to the removal of twenty uncoordinated water molecules and six coordinated water molecules (Calculated: 14.23%). After the losses of all water molecules, no weight loss is observed, indicating the decomposition of **1**. The TGA curve shows a weight loss of 15.27% for **2** during the first major step before 145 °C, corresponding to the removal of twenty-five uncoordinated water molecules (Calculated: 15.13%). After the losses of all uncoordinated water molecules, another weight loss of 2.92% is observed at 240 °C, corresponding to the removal of six coordinated water molecules (Calculated: 3.63%). The framework is stable up to 340 °C until decomposition. The TGA curve shows a weight loss of 16.55% for **3** during the first major step before 235 °C, corresponding to the removal of twenty-six uncoordinated water molecules and two coordinated water molecules (Calculated: 16.27%). After the losses of all water molecules, no weight loss is observed, indicating the decomposition of **3**

## 2. Power X-Ray diffraction

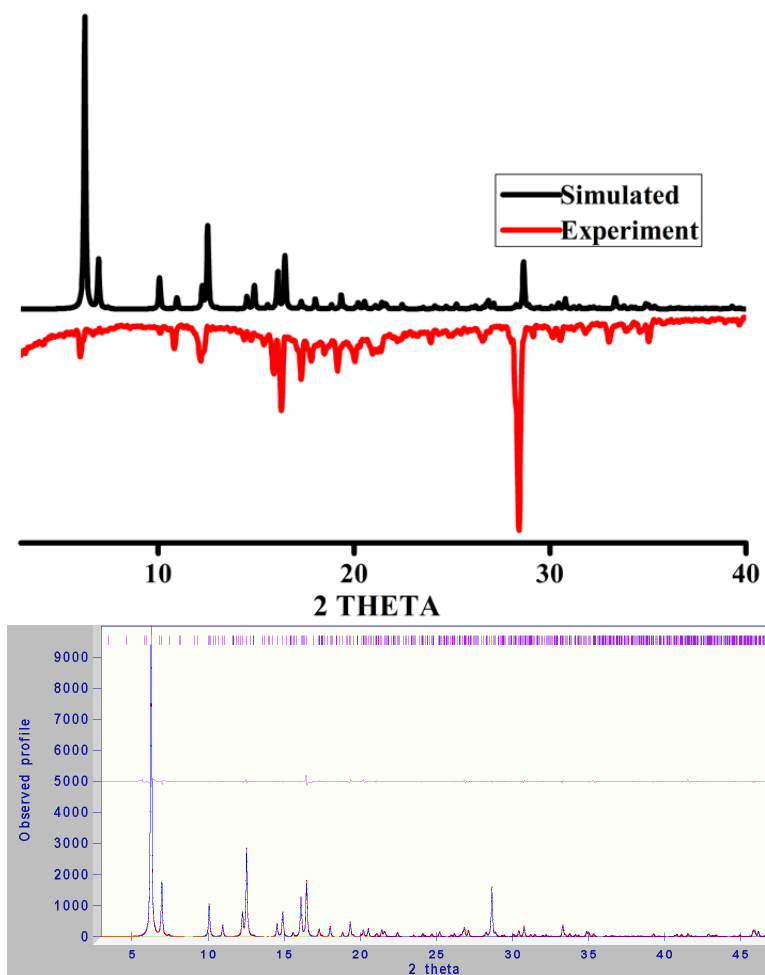

**Fig. S2.** Comparison of the experimental PXRD pattern of as-synthesized **1** with the one simulated from its single crystal structure (top); Room temperature X-ray diffraction pattern of **1** fitted using the Pawley method (bottom).

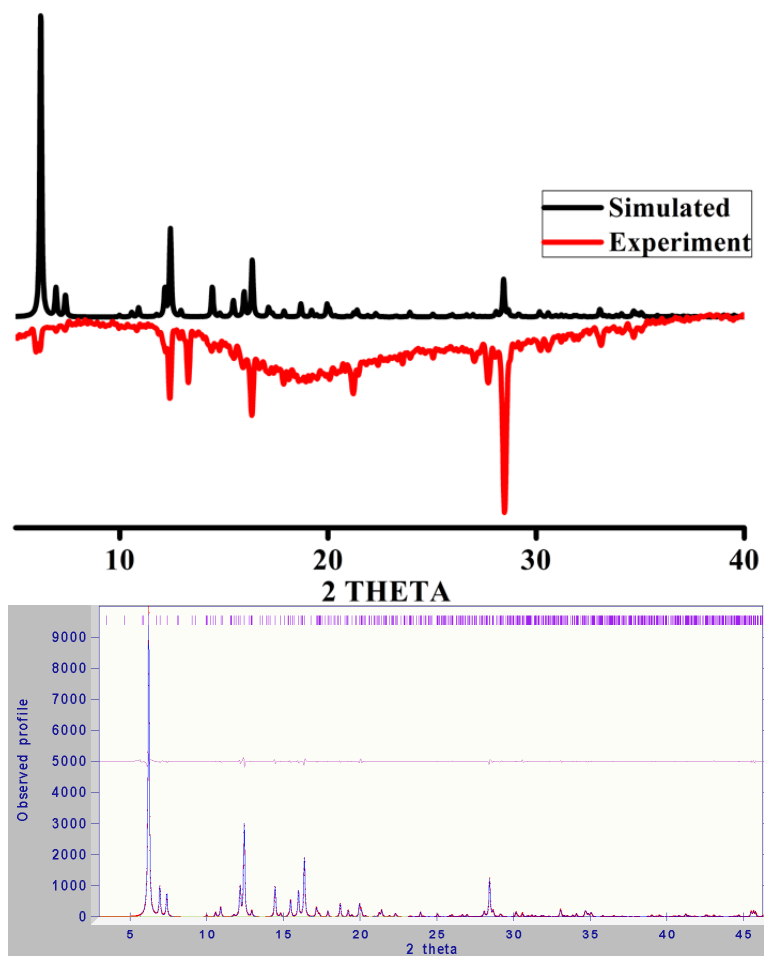

**Fig. S3.** Comparison of the experimental PXRD pattern of as-synthesized **2** with the one simulated from its single crystal structure (top); Room temperature X-ray diffraction pattern of **2** fitted using the Pawley method (bottom).

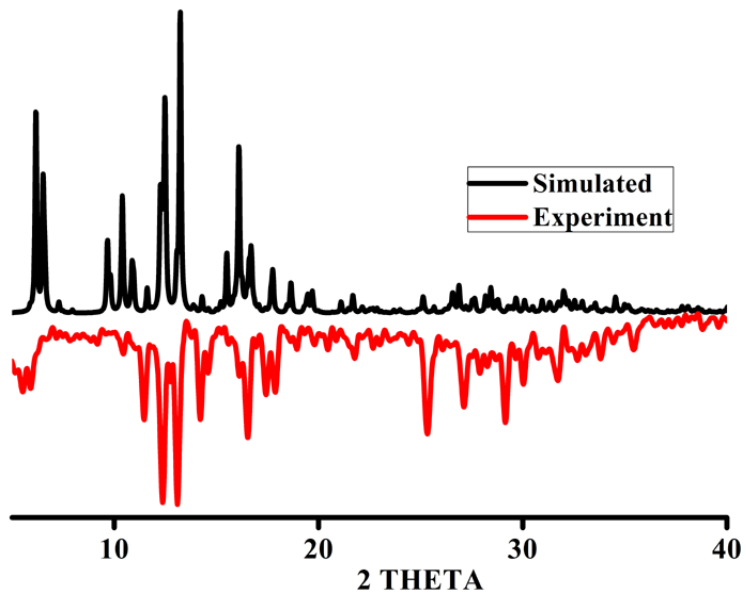

**Fig. S4.** Comparison of the experimental PXRD pattern of as-synthesized **3** with the one simulated from its single crystal structure.

### 3. Magnetism Measurements

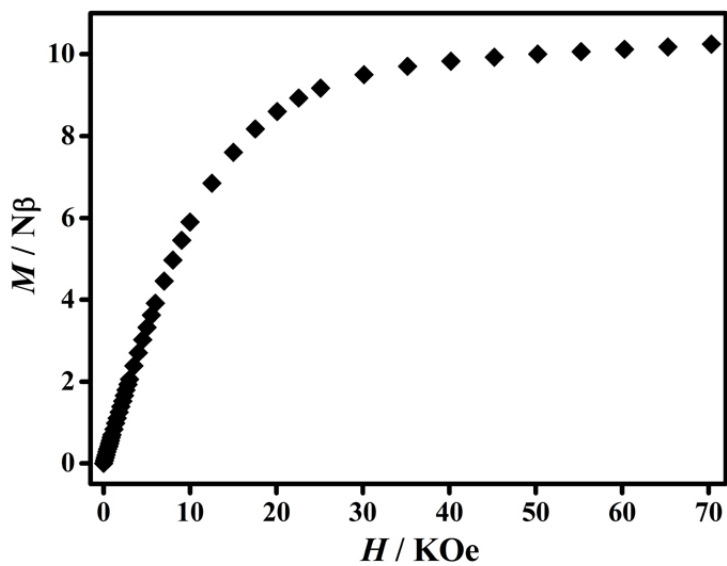

**Fig. S5.** Field dependence of magnetizations for **1** at 2 K

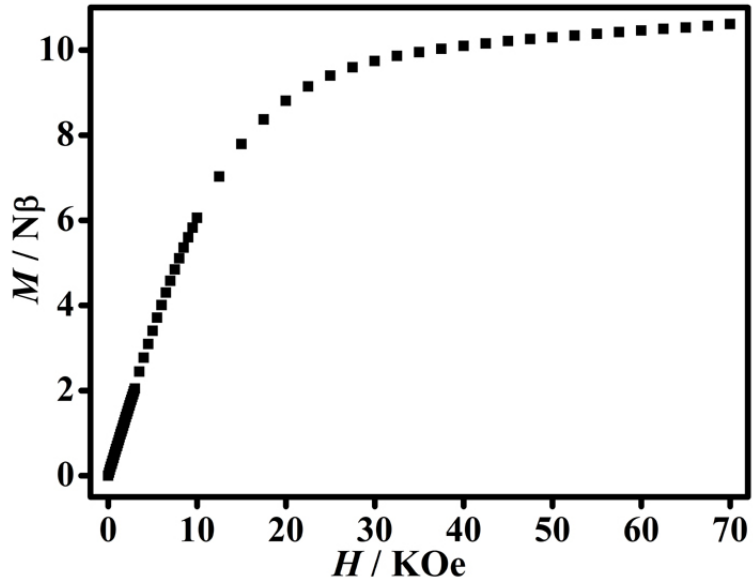

Fig. S6. Field dependence of magnetizations for 2 at 2 K.

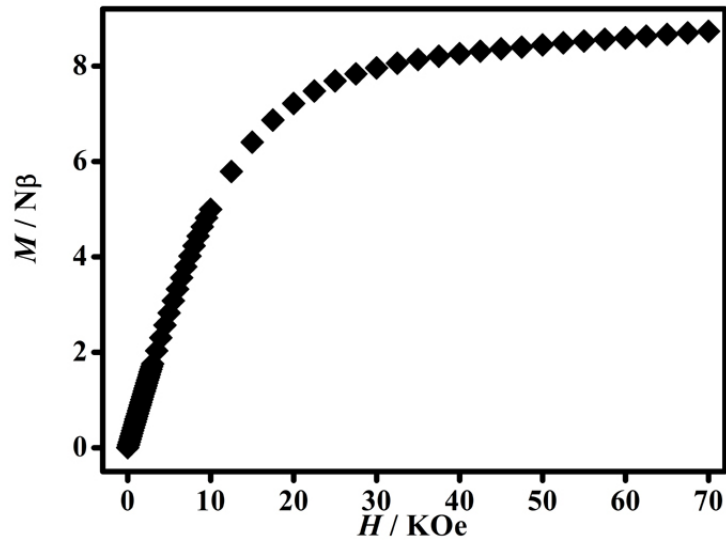

Fig. S7. Field dependence of magnetizations for 3 at 2 K.

#### 4. BVS Calculations

The bond valence sum (BVS) calculations have been carried out based on BVS model.<sup>1</sup>

**Table S1.** Bond valence values for cobalt centers in 1-3.

| Bond type     | Bond distance / Å | Bond valence | Bond valence sum |
|---------------|-------------------|--------------|------------------|
| <b>1</b>      |                   |              |                  |
| Co(1)-O(1)#1  | 2.016(3)          | 0.409        | 2.298 for Co1    |
| Co(1)-O(1)#2  | 2.016(3)          | 0.409        |                  |
| Co(1)-O(1)    | 2.016(3)          | 0.409        |                  |
| Co(1)-N(1)#1  | 2.031(4)          | 0.357        |                  |
| Co(1)-N(1)#2  | 2.031(4)          | 0.357        |                  |
| Co(1)-N(1)    | 2.031(4)          | 0.357        |                  |
| Co(2)-O(8)#3  | 1.996(4)          | 0.431        | 2.421 for Co2    |
| Co(2)-N(4)    | 2.004(4)          | 0.384        |                  |
| Co(2)-N(3)    | 1.997(4)          | 0.391        |                  |
| Co(2)-O(4)    | 2.004(3)          | 0.422        |                  |
| Co(2)-N(6)#3  | 2.016(5)          | 0.372        |                  |
| Co(2)-O(5)    | 2.006(4)          | 0.420        |                  |
| Co(3)-O(9) #4 | 2.048(3)          | 0.374        | 2.243 for Co3    |
| Co(3)-O(9) #5 | 2.048(3)          | 0.374        |                  |
| Co(3)-O(9) #6 | 2.048(3)          | 0.374        |                  |
| Co(3)-O(9) #7 | 2.048(3)          | 0.374        |                  |
| Co(3)-O(9) #8 | 2.048(3)          | 0.374        |                  |
| Co(3)-O(9)    | 2.048(3)          | 0.374        |                  |
| <b>2</b>      |                   |              |                  |
| Co(1)-O(1)    | 2.010(3)          | 0.415        | 2.332 for Co1    |
| Co(1)-O(1)#1  | 2.010(3)          | 0.415        |                  |
| Co(1)-O(1)#2  | 2.010(3)          | 0.415        |                  |
| Co(1)-N(1)#1  | 2.026(4)          | 0.362        |                  |
| Co(1)-N(1)#2  | 2.026(4)          | 0.362        |                  |
| Co(1)-N(1)    | 2.026(4)          | 0.362        |                  |
| Co(2)-O(5)    | 2.002(4)          | 0.425        | 2.334 for Co2    |
| Co(2)-O(4)    | 2.016(3)          | 0.409        |                  |
| Co(2)-O(8)#3  | 2.016(4)          | 0.409        |                  |
| Co(2)-N(6)#3  | 2.019(5)          | 0.369        |                  |
| Co(2)-N(4)    | 2.025(5)          | 0.363        |                  |
| Co(2)-N(3)    | 2.028(4)          | 0.360        |                  |
| Co(3)-O(9)    | 2.062(3)          | 0.361        | 2.166 for Co3    |
| Co(3)-O(9)#5  | 2.062(3)          | 0.361        |                  |
| Co(3)-O(9)#6  | 2.062(3)          | 0.361        |                  |
| Co(3)-O(9)#4  | 2.062(3)          | 0.361        |                  |
| Co(3)-O(9)#7  | 2.062(3)          | 0.361        |                  |
| Co(3)-O(9)#8  | 2.062(3)          | 0.361        |                  |
| <b>3</b>      |                   |              |                  |
| Co(1)-N(3)    | 1.976(6)          | 0.414        | 2.477 for Co1    |
| Co(1)-O(4)    | 1.984(5)          | 0.446        |                  |

|               |          |       |               |
|---------------|----------|-------|---------------|
| Co(1)-O(5)    | 1.992(5) | 0.436 |               |
| Co(1)-N(7)    | 1.987(7) | 0.402 |               |
| Co(1)-O(9)    | 2.017(5) | 0.408 |               |
| Co(1)-N(4)    | 2.017(6) | 0.371 |               |
| Co(2)-N(18)#2 | 1.988(6) | 0.401 | 2.389 for Co2 |
| Co(2)-O(2)#2  | 2.004(5) | 0.422 |               |
| Co(2)-N(1)#2  | 2.007(6) | 0.381 |               |
| Co(2)-O(24)#2 | 2.011(5) | 0.414 |               |
| Co(2)-O(16)   | 2.013(4) | 0.412 |               |
| Co(2)-N(12)   | 2.030(5) | 0.358 |               |
| Co(3)-N(9)    | 1.988(7) | 0.401 | 2.393 for Co3 |
| Co(3)-O(17)   | 2.002(6) | 0.425 |               |
| Co(3)-O(13)   | 2.010(5) | 0.415 |               |
| Co(3)-N(10)   | 2.009(5) | 0.379 |               |
| Co(3)-O(12)   | 2.022(5) | 0.402 |               |
| Co(3)-N(13)   | 2.017(6) | 0.371 |               |
| Co(4)-O(20)   | 1.971(7) | 0.462 | 2.447 for Co4 |
| Co(4)-N(16)   | 1.996(7) | 0.393 |               |
| Co(4)-O(21)   | 1.998(5) | 0.429 |               |
| Co(4)-N(15)   | 2.013(6) | 0.375 |               |
| Co(4)-N(6)#2  | 2.005(7) | 0.383 |               |
| Co(4)-O(7)#2  | 2.019(5) | 0.405 |               |

---

Symmetry transformations used to generate equivalent atoms:

For 1: #1:  $-x+y+1, -x+2, z$ , #2:  $-y+2, x-y+1, z$ , #3:  $y, x-y+1, -z+1$ , #4:  $x-y, x, -z+1$ , #5:  $-x+y, -x, z$  #6:  $-y, x-y, z$ , #7:  $y, -x+y, -z+1$ , #8:  $-x, -y, -z+1$ , #9:  $x-y+2/3, -y+4/3, -z+5/6$ ;

For 2: #1:  $-x+y+1, -x+2, z$ , #2:  $-y+2, x-y+1, z$ , #3:  $y, -x+y+1, -z+1$ , #4:  $x-y, x, -z+1$ , #5:  $-x+y, -x, z$ , #6:  $-y, x-y, z$ , #7:  $y, -x+y, -z+1$ , #8:  $-x, -y, -z+1$ , #9:  $x-y+2/3, -y+4/3, -z+5/6$ ;

For 3: #1:  $-x+1, y, -z+1/2$ , #2:  $-x+3/2, -y+3/2, -z+1$ .



## 5. X-ray Photoelectron Spectroscopy

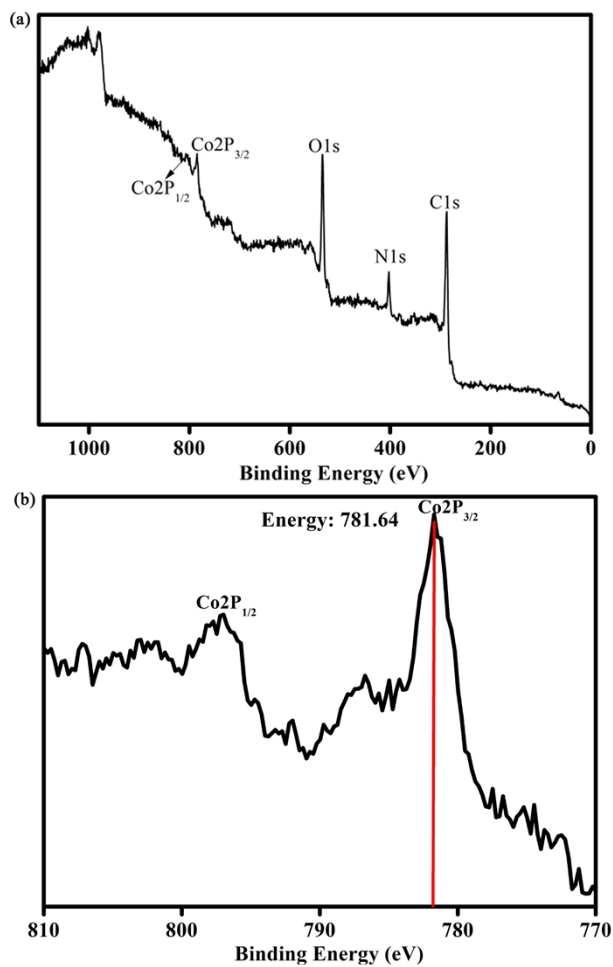

Fig. S8. (a) X-ray photoelectron spectroscopy (XPS) of **1**; (b) XPS of the Co  $2p$  level in **1**.

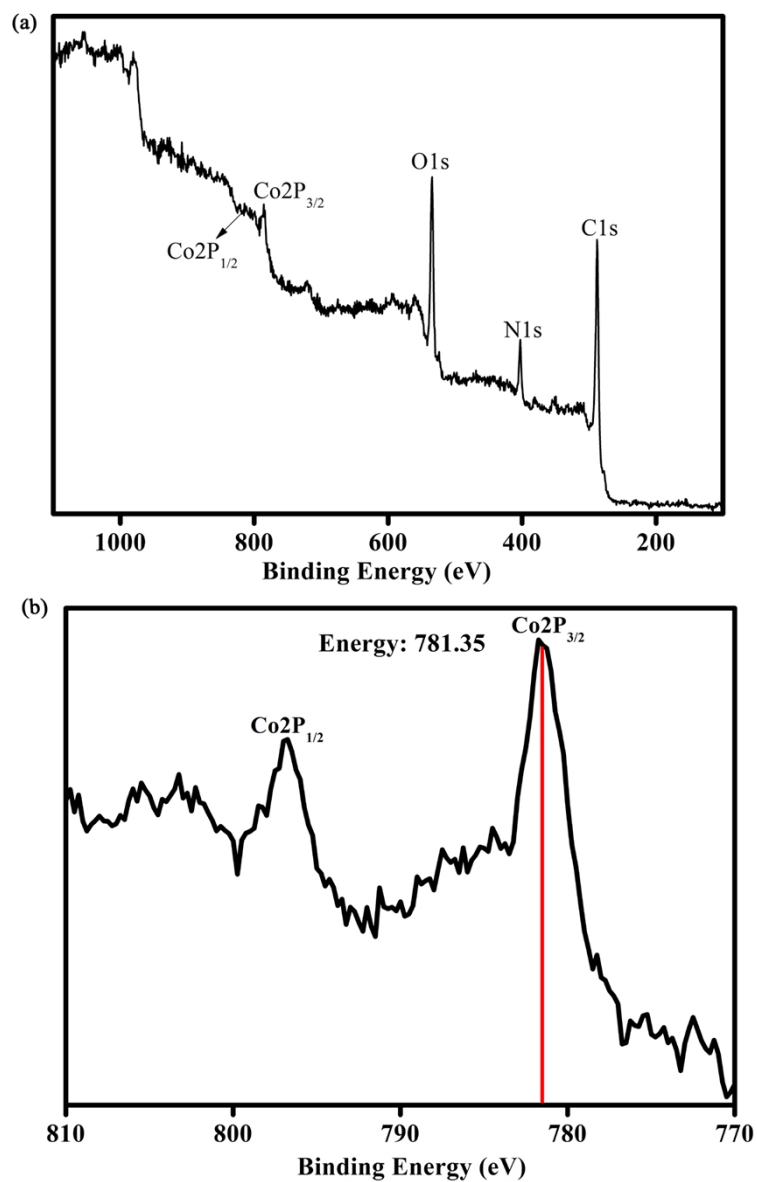

Fig. S9. (a) X-ray photoelectron spectroscopy (XPS) of **2**; (b) XPS of the Co  $2p$  level in **2**.

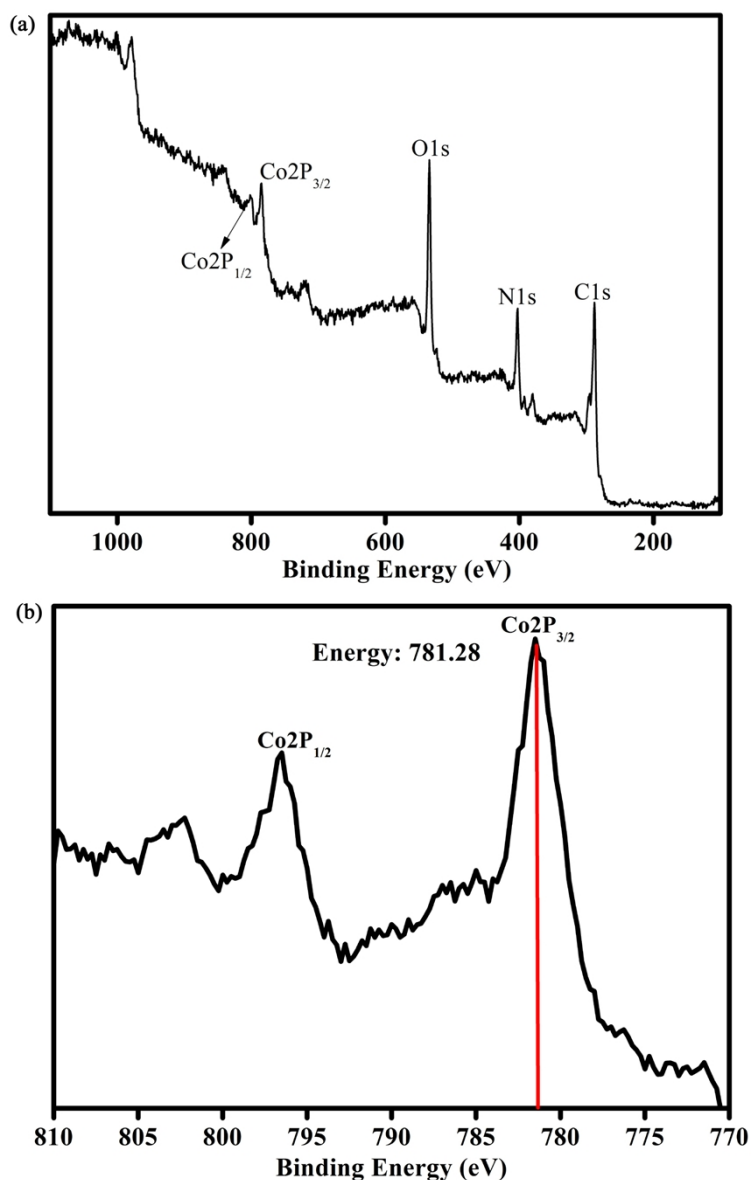

Fig. S10. (a) X-ray photoelectron spectroscopy (XPS) of **3**; (b) XPS of the Co  $2p$  level in **3**.

The characteristic peaks of Co $^{3+}2P_{3/2}$  level of 779.2-779.6 eV with 15.1 eV splitting in **1-3** are not observed.<sup>2</sup> Instead, the Co $2p$  spectrum with shake-up levels agreed well with the known Co $^{2+}$  complexes.<sup>3</sup> These results indicate that all cobalt ions are divalent in **1-3**.

1. I. D. Brown, *The Chemical Bond in Inorganic Chemistry: The Bond Valence Model*, published by Oxford University Press, 2002, database available at <http://www.iucr.org/resources/data/data-sets/bond-valence-parameters>
2. S. H. Xiang, X. T. Wu, J. J. Zhang, R. B. Fu, S. M. Hu and X. D. Zhang, *J. Am. Chem. Soc.*, 2005, **127**, 16352.
3. (a) J. H. Burness, J. G. Dillard and L. T. Taylor, *J. Am. Chem. Soc.*, 1975, 6080; (b) J. Y. Zou, W. Shi, N. Xu, L. L. Li, J. K. Tang, H. L. Gao, J. Z. Cui and P. Cheng, *Chem. Commun.*, 2013, **49**, 8226.
